# Supplementary material
Source: PubMed Central journal article supplement (PMC6697572)
Supplement: NIHMS1043196-supplement-Supp_Fogures.pdf [file NIHMS1043196-supplement-Supp_Fogures.pdf]

**Figure S1.** Association between altitude and hemoglobin fit with a penalized B-spline with three knots by survey for preschool-aged children (PSC) and women of reproductive age (WRA)\*

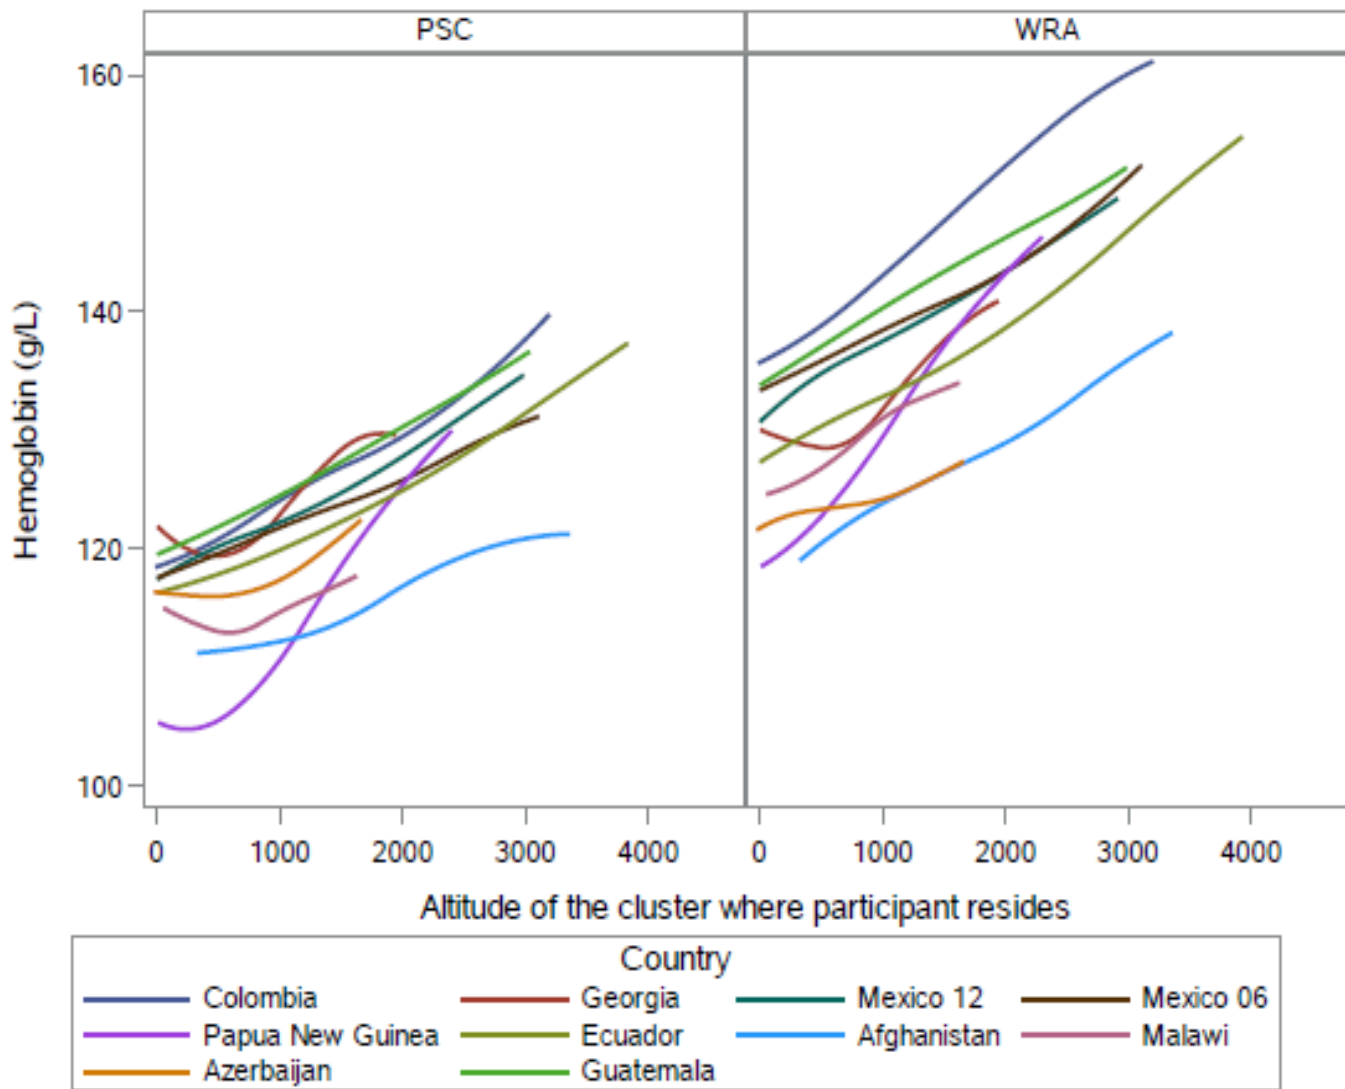

\*Excludes surveys with no variation in altitude (Bolivia and the United Kingdom) or altitude was reported only in three categories (Laos)

**Figure S2.** Mean (95% CI) inflammation-corrected soluble transferrin receptor (sTfR) concentration by hemoglobin adjusted for altitude using the proposed equations to adjust hemoglobin (Hb) for altitude and smoking\*

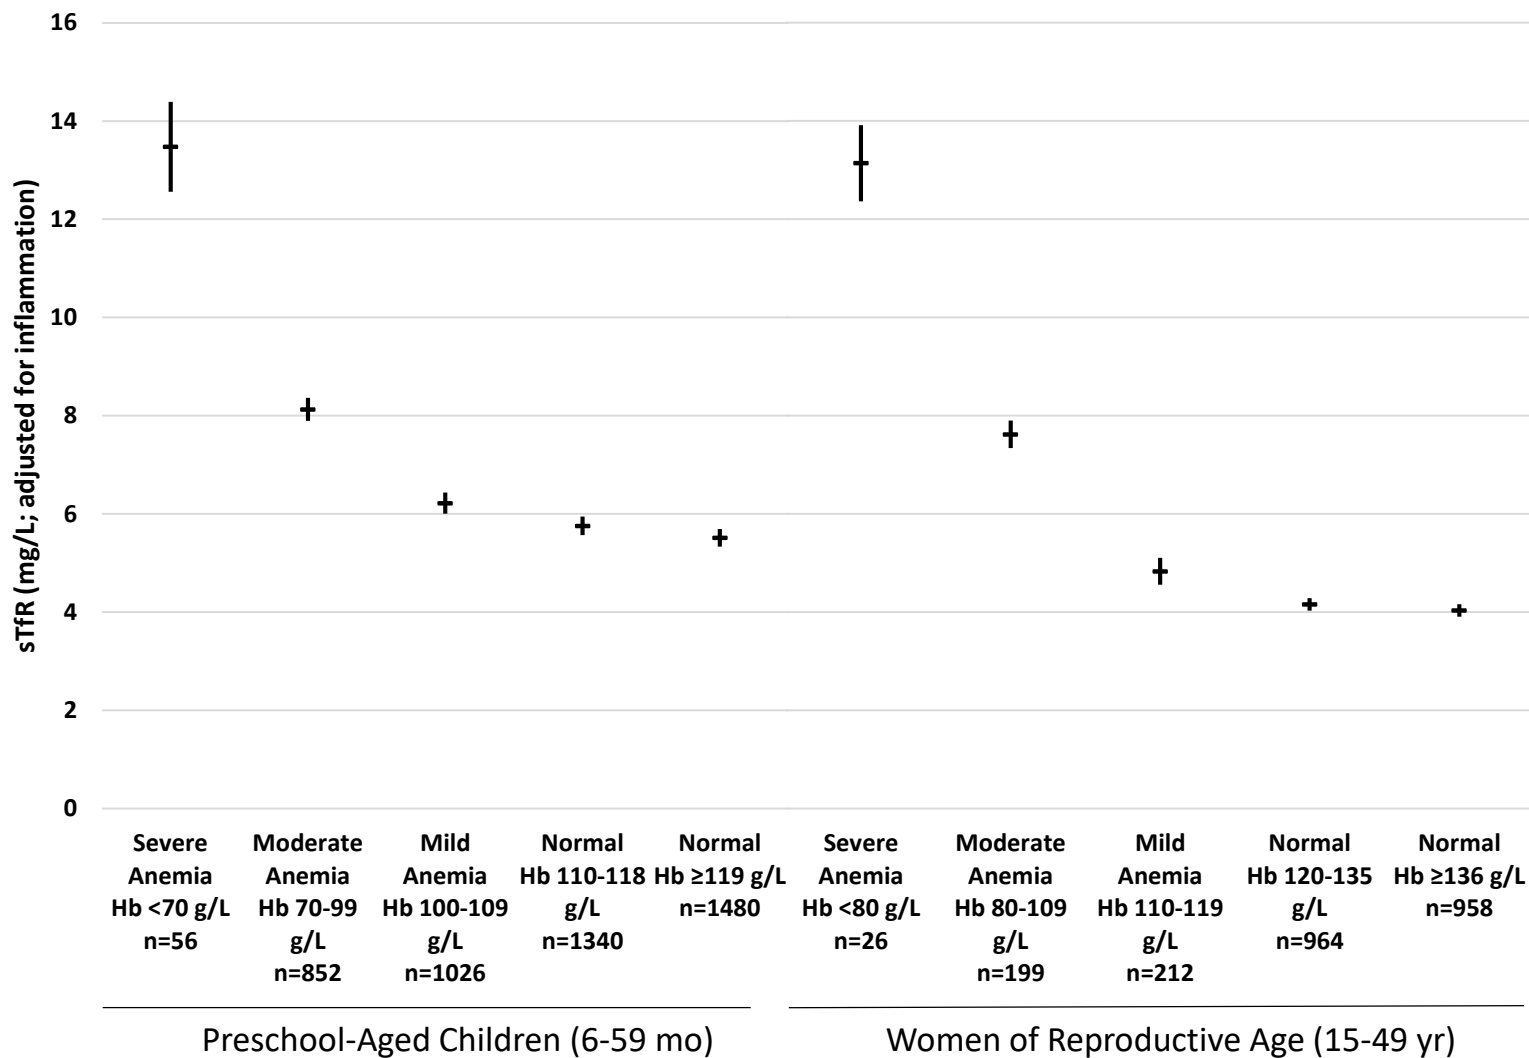

\*Difference in mean sTfR between Hb categories:  $P < 0.005$  except for between the Normal groups for PSC ( $P = 0.35$ ) and WRA including smoking ( $P = 0.66$ ). Hb adjusted by subtracting the following values from individual Hb concentration: For PSC,  $Hb\_adjustment (g/L) = (0.0048108 * altitude) + (0.0000004 * altitude^2)$ . For WRA,  $Hb\_adjust\_altitude (g/L) = (0.0052792 * altitude) + (0.0000003 * altitude^2)$ . Adjustment for smoking was in addition to the adjustment for altitude based on: if cigarette quantity known  $Hb\_adjust\_smoking (g/L) = (0.4573 * cigarette\_number) + (-0.0078 * cigarette\_number^2)$ ; if cigarette quantity unknown,  $Hb\_adjust\_smoking (g/L) =$

a Data from Azerbaijan, Bolivia, Guatemala, Laos, Malawi, and Papua New Guinea where sTfR and AGP were assessed.

b Data from Guatemala, and Papua New Guinea where both altitude and smoking data available and sTfR and AGP were assessed.

**Figure S3.** Mean (95% confidence interval) hemoglobin concentrations by smoking status for each country and for all countries combined (Panel A: Crude difference; Panel B, Hb adjusted for altitude).<sup>a</sup>

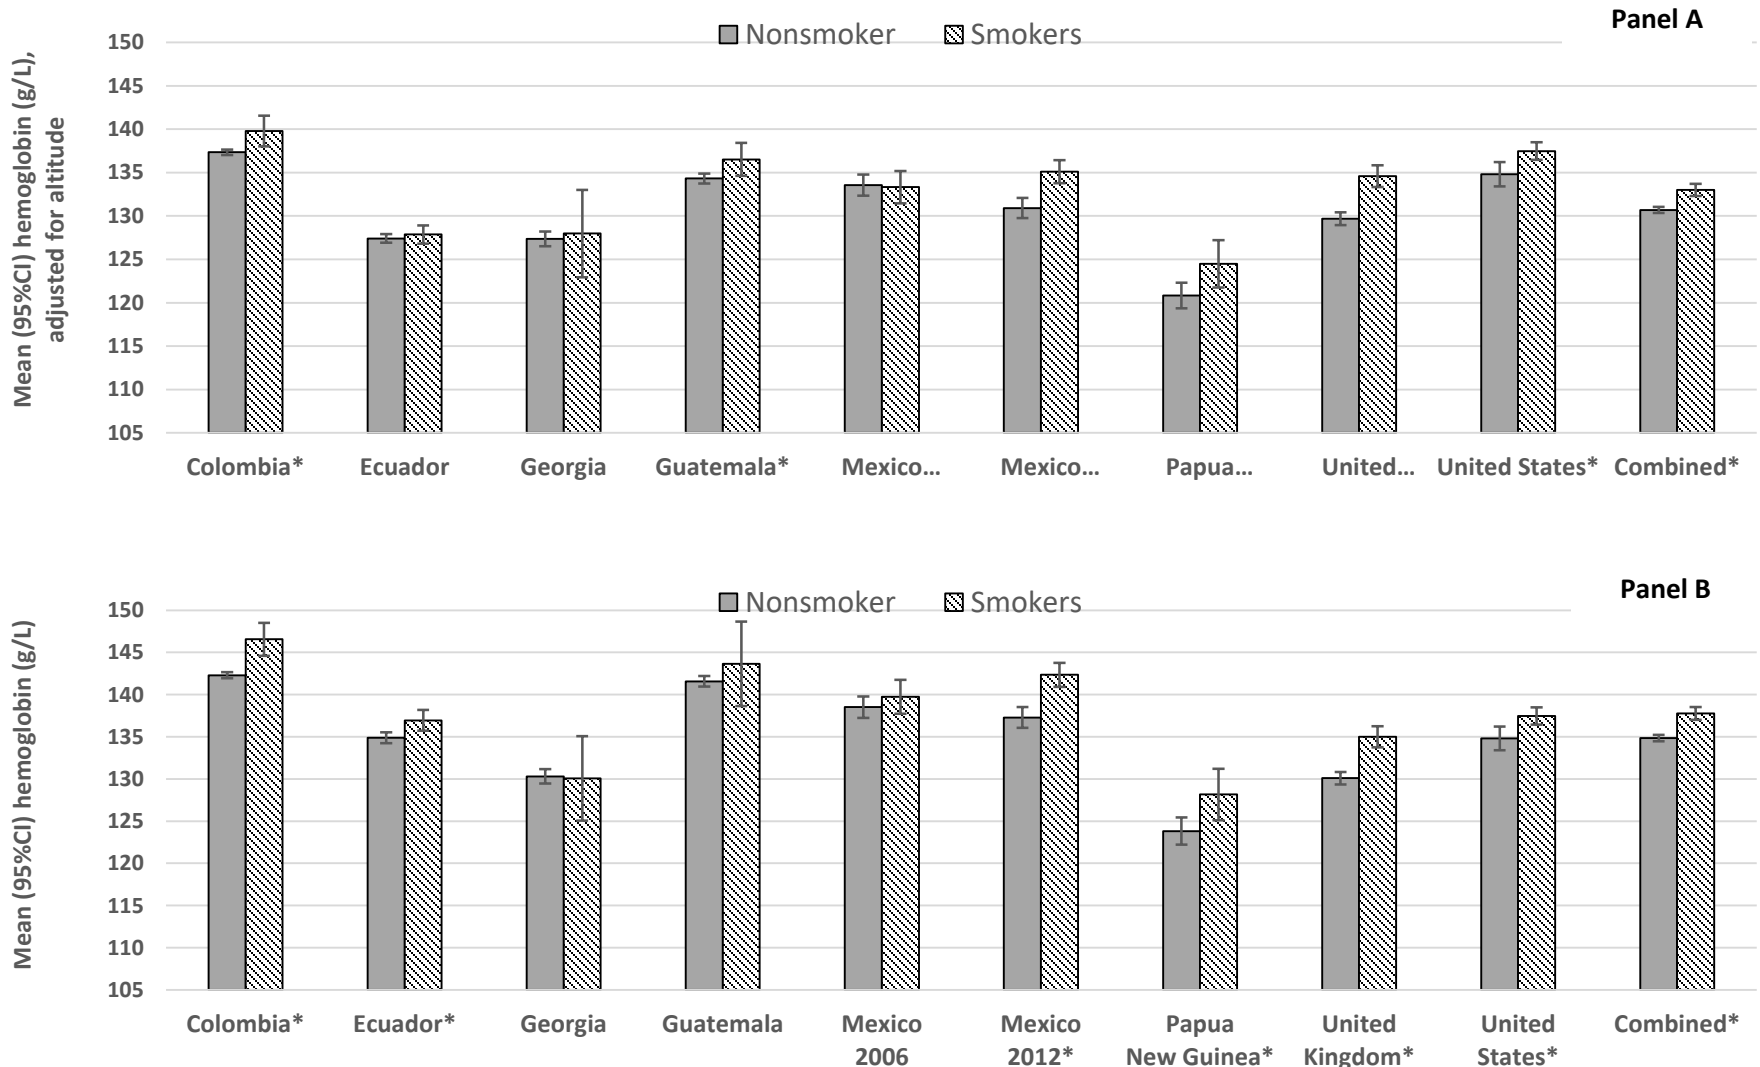

<sup>a</sup> Altitude adjustment based on WHO cutoffs.<sup>7</sup>

\*Mean hemoglobin significantly higher among smokers,  $P < 0.03$ .
